# Supplementary material for: Visible light-driven photocatalytic and photoelectrochemical studies of Ag–SnO2 nanocomposites synthesized using an electrochemically active biofilm
Source: Royal Society of Chemistry journal article supplement (doi:10.1039/c4ra03448a), 2014-01-01
Supplement: c4ra03448a1.pdf [file c4ra03448a1.pdf]

## Electronic Supplementary Information

### Visible light-driven photocatalytic and photoelectrochemical studies of Ag-SnO<sub>2</sub> nanocomposites synthesized using an electrochemically active biofilm

Sajid Ali Ansari, Mohammad Mansoob Khan, Mohd Omaish Ansari, Jintae Lee, and Moo Hwan Cho\*

School of Chemical Engineering, Yeungnam University, Gyeongsan-si, Gyeongbuk 712-749,

South Korea.

#### UV-vis diffuse reflectance spectra of the *p*-SnO<sub>2</sub>, 1 mM and 3 mM Ag-SnO<sub>2</sub> nanocomposites

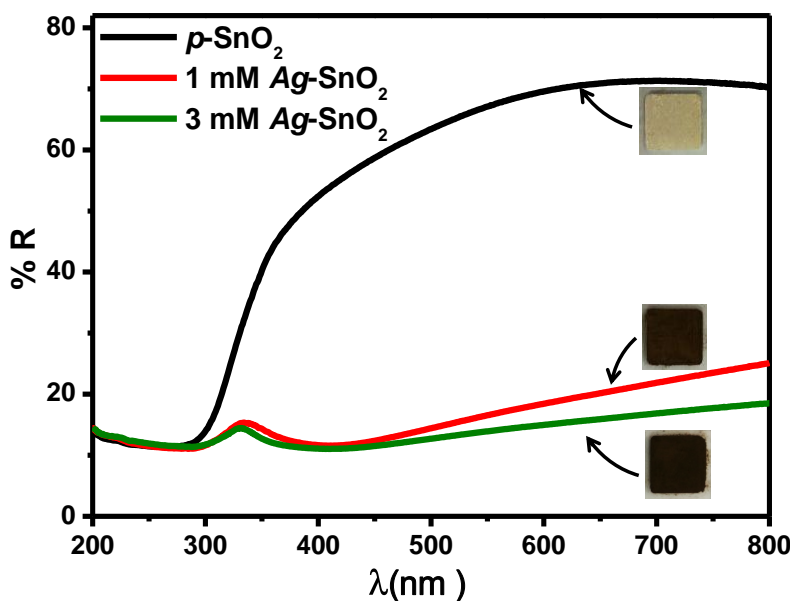

**Fig. S1** UV-vis diffuse reflectance spectra of the *p*-SnO<sub>2</sub>, 1 mM and 3 mM Ag-SnO<sub>2</sub> nanocomposites. The inset shows the color of the *p*-SnO<sub>2</sub>, 1 mM and 3 mM Ag-SnO<sub>2</sub> nanocomposites.

**TEM image of the  $p$ -SnO<sub>2</sub> nanostructures**

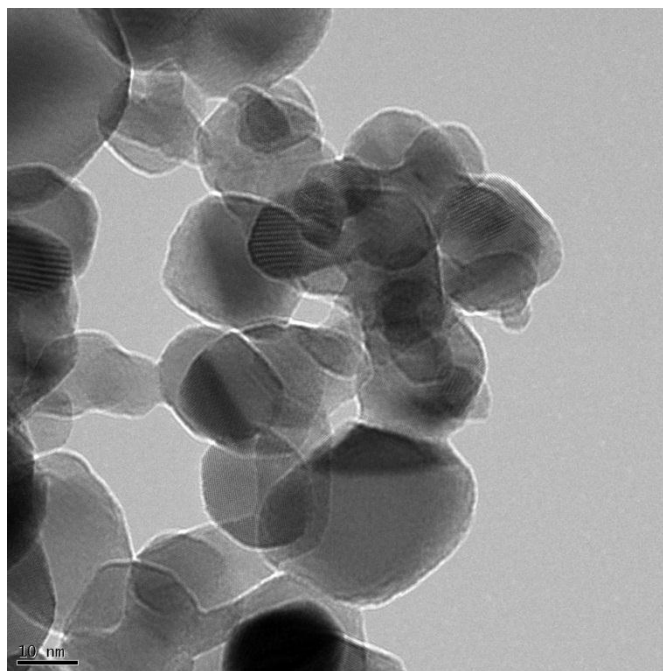

**Fig. S2** TEM image of the  $p$ -SnO<sub>2</sub> nanostructures.

**HR-TEM image of the  $p$ -SnO<sub>2</sub> nanostructures**

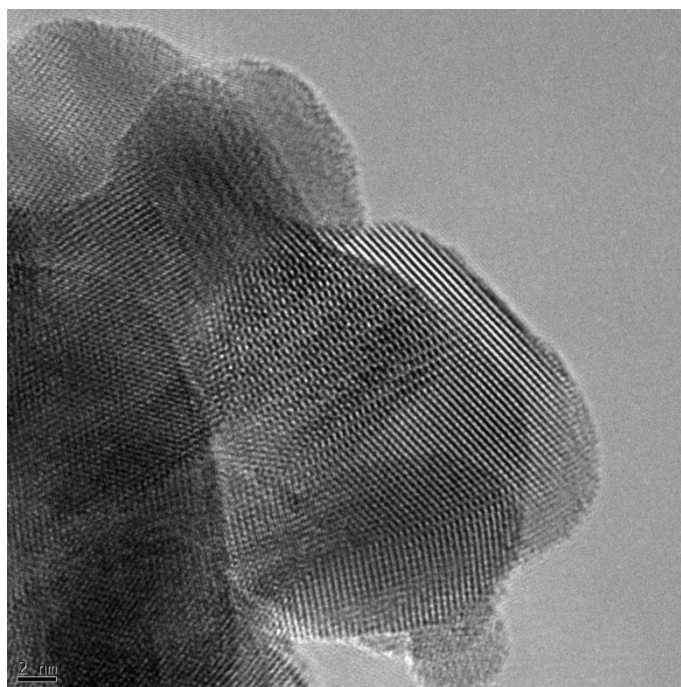

**Fig. S3** HR-TEM image of the  $p$ -SnO<sub>2</sub> nanostructures.

**SAED patterns of the  $p$ -SnO<sub>2</sub> nanostructures**

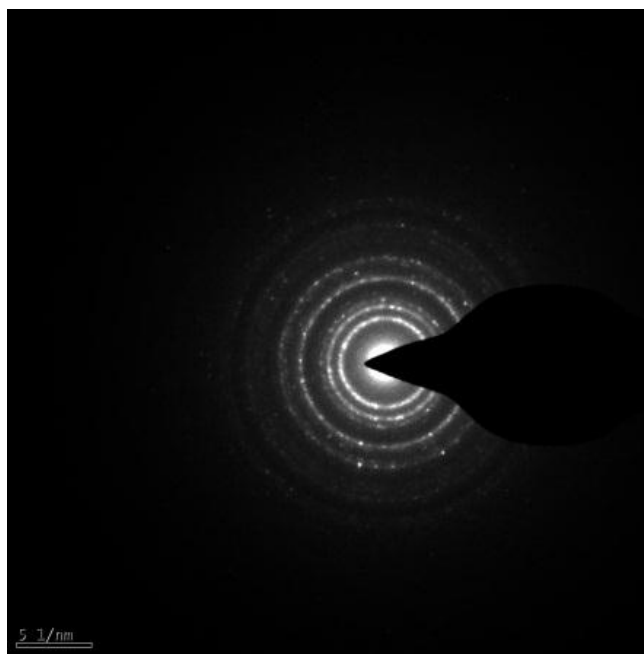

**Fig. S4** SAED patterns of the  $p$ -SnO<sub>2</sub> nanostructures.

**SAED patterns of the 1 mM Ag-SnO<sub>2</sub> nanocomposite**

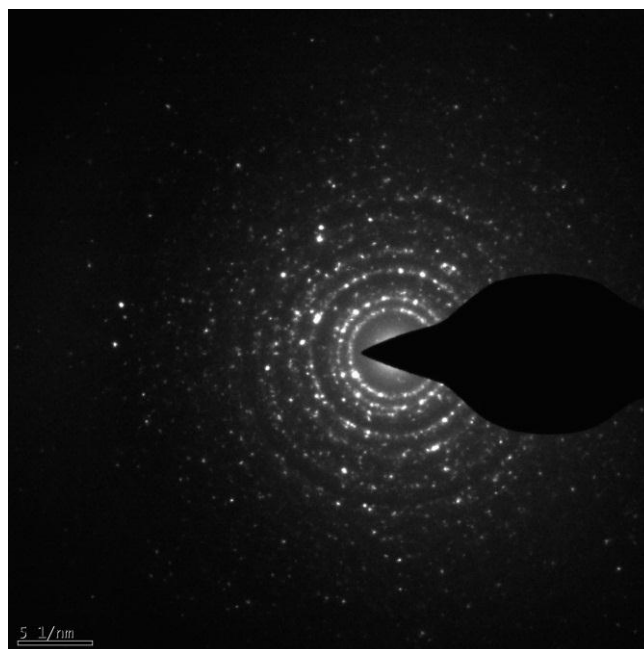

**Fig. S5** SAED patterns of the 1 mM Ag-SnO<sub>2</sub> nanocomposite.

**SAED patterns of the 3 mM Ag-SnO<sub>2</sub> nanocomposite**

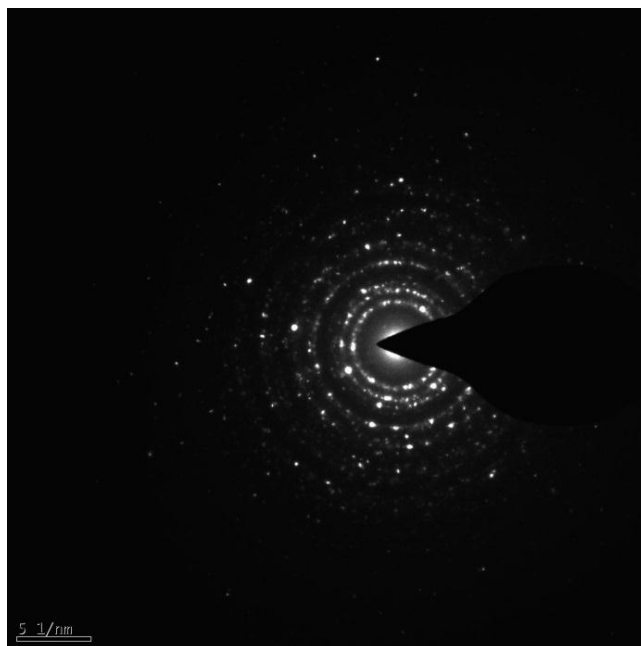

**Fig. S6** SAED patterns of the 3 mM Ag-SnO<sub>2</sub> nanocomposite.

**Acquire HAADF FE-TEM image of the *p*-SnO<sub>2</sub> nanostructures**

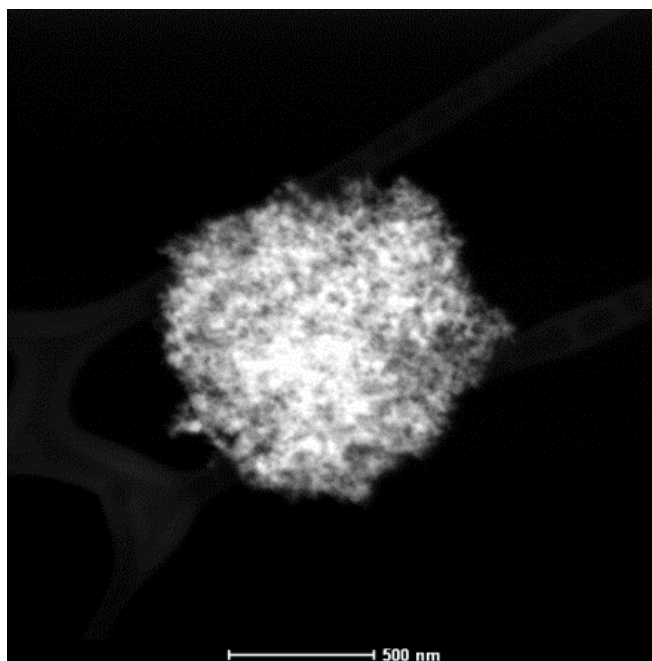

**Fig. S7** Representative HAADF FE-TEM image of the *p*-SnO<sub>2</sub> nanostructures.

Acquire HAADF FE-TEM image of the 1 mM Ag-SnO<sub>2</sub> nanocomposite

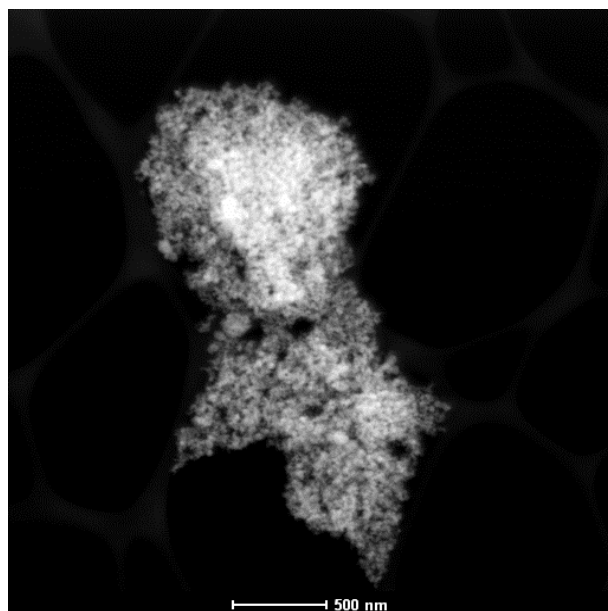

**Fig. S8** Representative HAADF FE-TEM image of the 1 mM Ag-SnO<sub>2</sub> nanocomposite.

Acquire HAADF FE-TEM image of the 1 mM Ag-SnO<sub>2</sub> nanocomposite

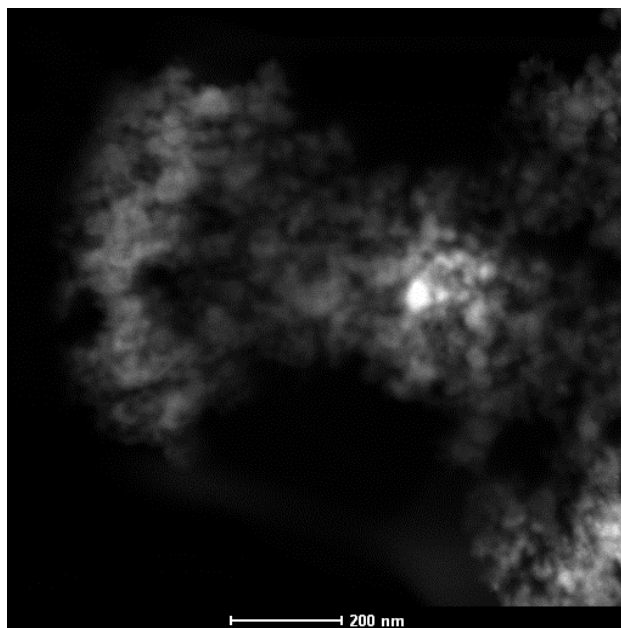

**Fig. S9** Representative HAADF FE-TEM image of the 1 mM Ag-SnO<sub>2</sub> nanocomposite.

### EDX of the $p$ -SnO<sub>2</sub> nanostructures

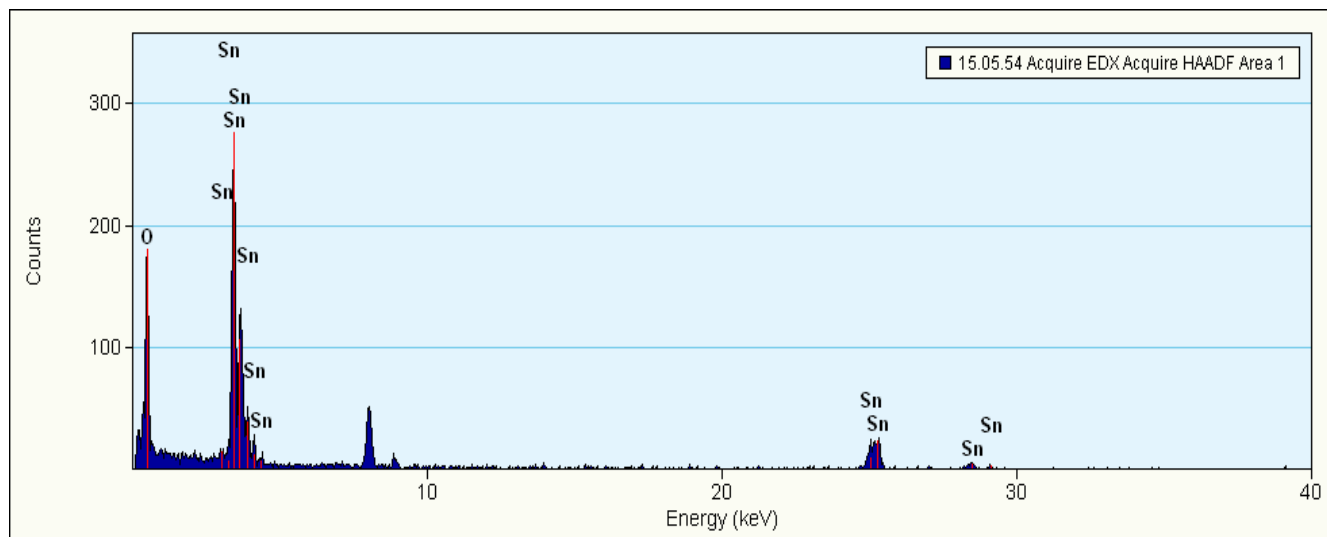

Fig. S10 EDX of the  $p$ -SnO<sub>2</sub> nanostructures.

### EDX of the 1 mM Ag-SnO<sub>2</sub> nanocomposite

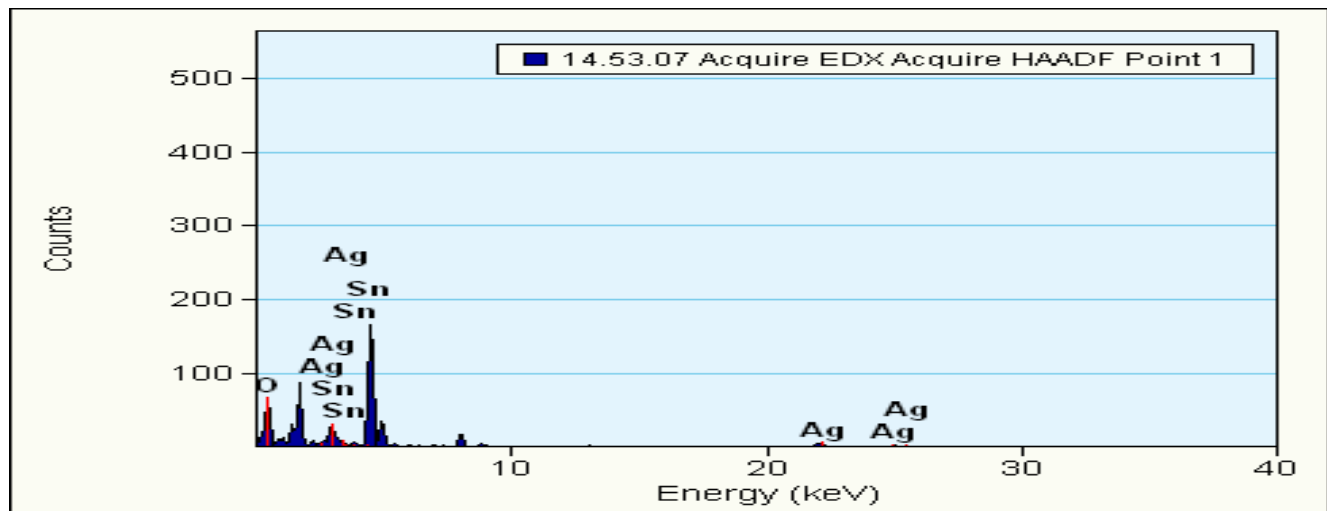

Fig. S11 EDX of the 1 mM Ag-SnO<sub>2</sub> nanocomposite.

### EDX of the 3 mM Ag-SnO<sub>2</sub> nanocomposite

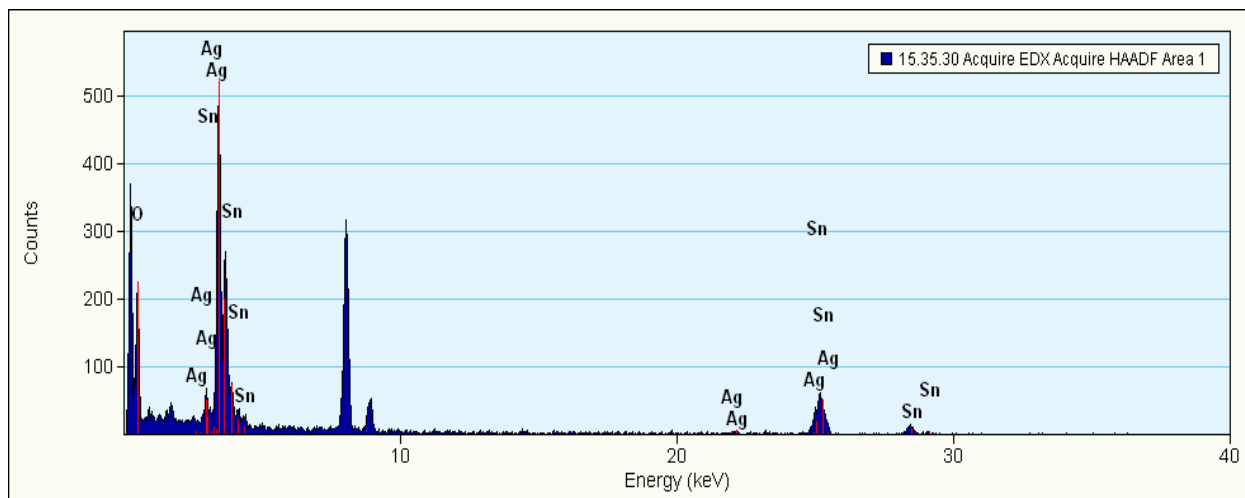

Fig. S12 EDX of the 3 mM Ag-SnO<sub>2</sub> nanocomposite.

### C1s spectra of the *p*-SnO<sub>2</sub>, 1 mM and 3 mM Ag-SnO<sub>2</sub> nanocomposites

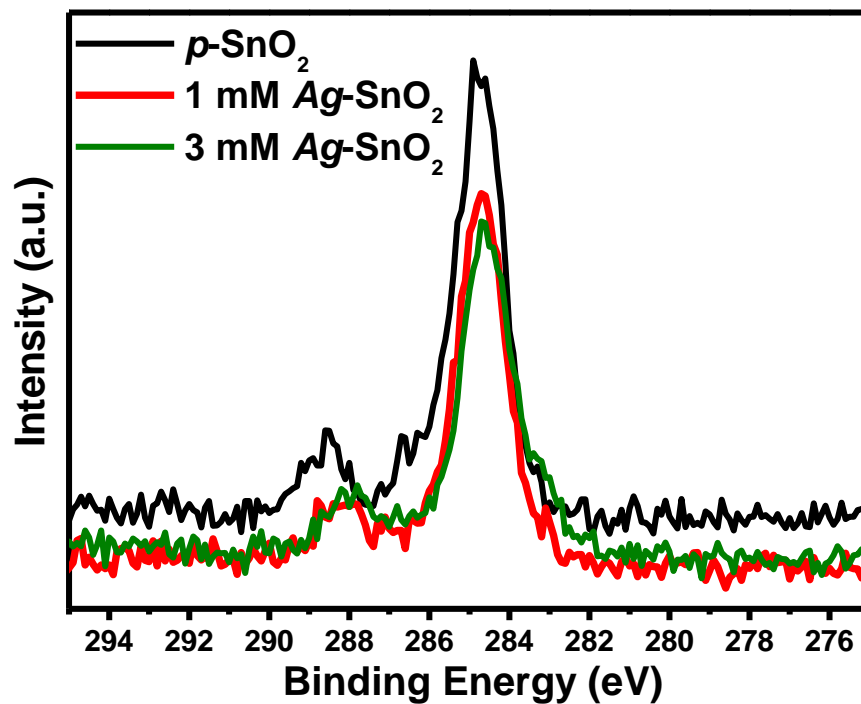

Fig. S13 C1s spectra of the *p*-SnO<sub>2</sub>, 1 mM and 3 mM Ag-SnO<sub>2</sub> nanocomposites.

Plots for the photodegradation of MO, MB, 4-NP and 2-CP by  $p\text{-SnO}_2$ , 1 mM and 3 mM  $\text{Ag-SnO}_2$  nanocomposites under visible light irradiation

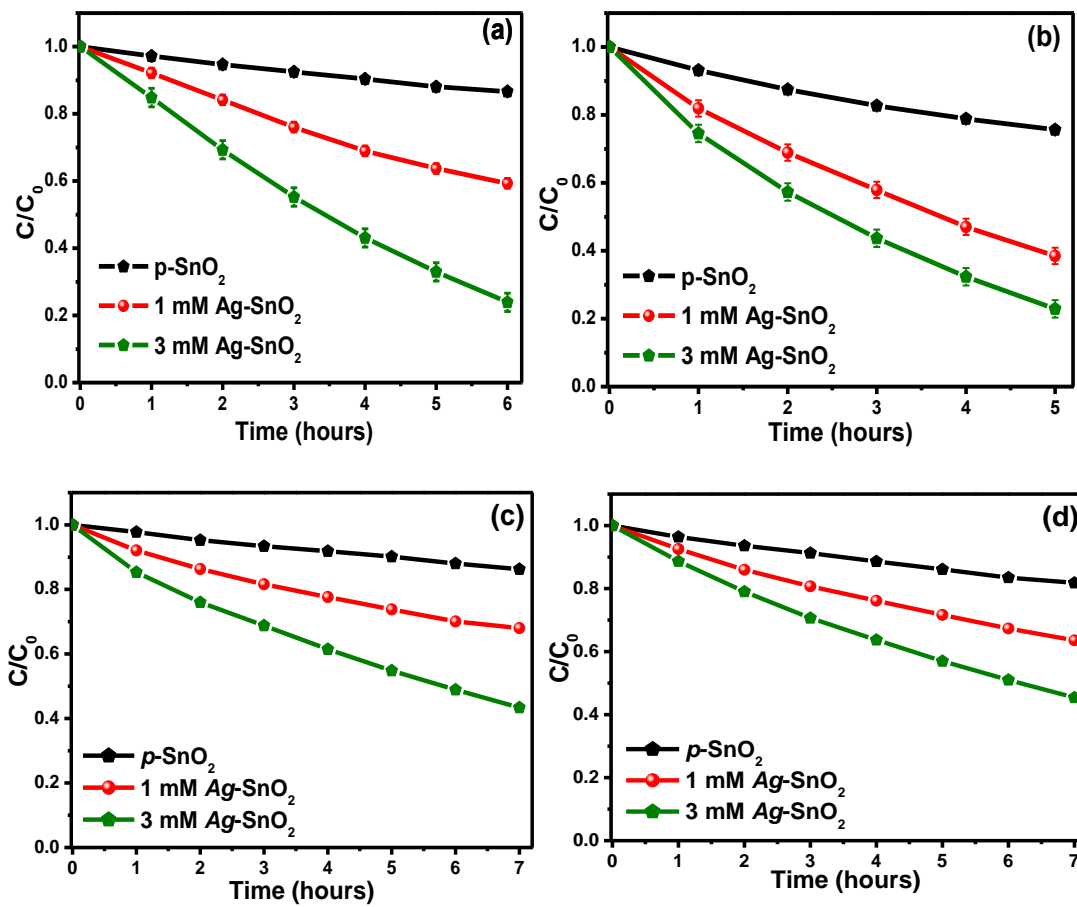

**Fig. S14**  $C/C_0$  versus irradiation time (h) plot for the photodegradation of (a) MO, (b) MB, (c) 4-NP, and (d) 2-CP by  $p\text{-SnO}_2$ , 1 mM and 3 mM  $\text{Ag-SnO}_2$  nanocomposites under visible light irradiation.



### Stability test of the Ag-SnO<sub>2</sub> nanocomposite

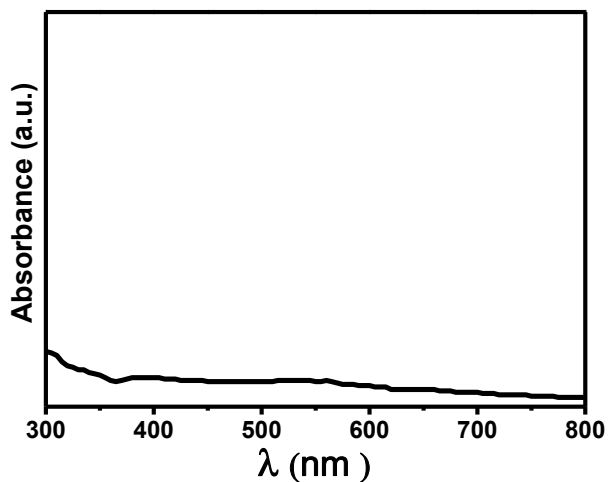

Fig. S15 Stability test of the 3 mM Ag-SnO<sub>2</sub> nanocomposite after 1 hour sonication.

### Recycled photodegradation of MO and MB by 3 mM Ag-SnO<sub>2</sub> nanocomposite under visible light irradiation

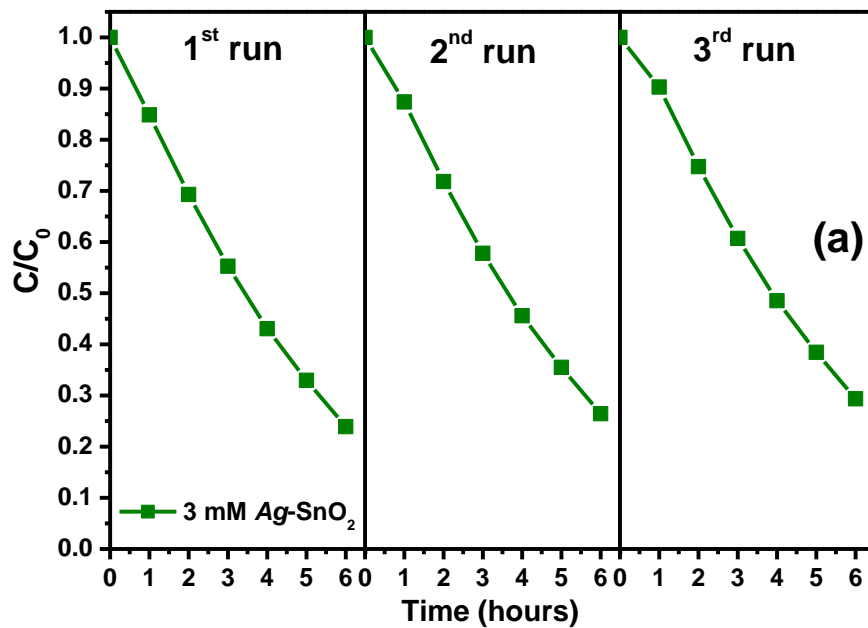

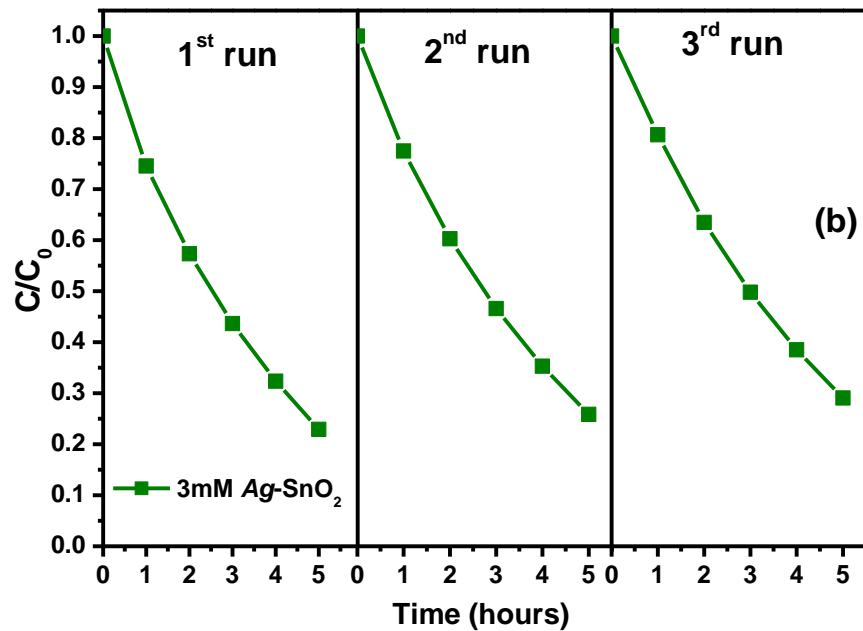

**Fig. S16** Recycled photodegradation (a) MO, and (b) MB by 3 mM Ag-SnO<sub>2</sub> nanocomposite under visible light irradiation.
